# Supplementary material for: Isolation of a PRD1-like Phage Uncovers the Carriage of Three Putative Conjugative Plasmids in Clinical Burkholderia Contaminans
Source: Preprints.org preprint supplement (doi:10.20944/preprints202304.0153.v1), 2023-04-10
Supplement: Supplementary file 1 [file supplementary]

## Sheet: Supplementary Table 1
Supplementary Table 1: Efflux pump-related genes found in B. contaminans 5080
Chromosome	Position	Locus tag	Putative family
CP120947	1,999,861 - 2,002,295	P4E65_09190; P4E65_09195; P4E65_09200	MFS
CP120947	1,176,489 - 1,175,101	P4E65_05415	MATE
CP120947	2,019,147 - 2,024,510	P4E65_09315; P4E65_09320; P4E65_09325; P4E65_09330	MFS
CP120947	2,092,123 - 2,096,205	P4E65_09650; P4E65_09655; P4E65_09660; P4E65_09665	ABC
CP120947	2,184,254 - 2,184,307	P4E65_10070; P4E65_10075	MFS
CP120947	2,187,577 - 2,188,938	P4E65_10095	MATE
CP120947	2,519,629 - 2,523,437	P4E65_11685; P4E65_11690; P4E65_11695	ABC
CP120947	3,166,178 - 3,173,234	P4E65_14680; P4E65_14685; P4E65_14690; P4E65_14695	RND
CP120947	1,536,249 - 1,534,885	P4E65_07125	MATE
CP120947	2,076,788 - 2,083,421	P4E65_09585; P4E65_09590; P4E65_09595; P4E65_09600	RND
CP120947	2,252,503 - 2,531,957	P4E65_11705; P4E65_11710; P4E65_11715; P4E65_11720	RND
CP120947	277,938 - 282,198	P4E65_01215; P4E65_01220; P4E65_01225; P4E65_01230	ABC
CP120947	1,366,203 - 1,374,099	P4E65_06395; P4E65_06400; P4E65_06405; P4E65_06410	RND
CP120947	1,885,485 - 1,892,097	P4E65_08730; P4E65_08735; P4E65_08740; P4E65_08745	RND
CP120947	1,982,621 - 1,985,542	P4E65_09105; P4E65_09110; P4E65_09115	ABC
CP120947	1,991,043 - 1,993,942	P4E65_09155; P4E65_09160	MFS
CP120947	2,039,488 - 2,043,246	P4E65_09395; P4E65_09400; P4E65_09405; P4E65_09410	ABC
CP120948	860,157 - 862,787	P4E65_21425; P4E65_21430	MFS
CP120948	862,830 - 867,470	P4E65_21435; P4E65_21440;P4E65_21445	ABC
CP120948	1,125,079 - 1,131,581	P4E65_22625; P4E65_22630; P4E65_22635; P4E65_22640	RND
CP120948	1,762,032 - 1,768,969	P4E65_25410; P4E65_25415; P4E65_25420; P4E65_25425	RND
CP120948	1,797,420 - 1,802,688	P4E65_25565; P4E65_25570; P4E65_25575; P4E65_25580; P4E65_25585	ABC
CP120948	2,713,744 -2,719,441	P4E65_29585; P4E65_29590; P4E65_29595	RND
CP120948	2,806,533 - 2,813,291	P4E65_30025; P4E65_30030; P4E65_30035; P4E65_30040	RND
CP120948	357,821 - 364,371	P4E65_19260; P4E65_19265; P4E65_19270; P4E65_19275	RND
CP120948	1,157,548 - 1,162,400	P4E65_22780; P4E65_22785; P4E65_22790	MFS
CP120948	1,825,958 - 1,830,019	P4E65_25685; P4E65_25690; P4E65_25695	ABC
CP120949	1,074,267 - 1,080,835	P4E65_36705; P4E65_36710; P4E65_36715; P4E65_36720	RND
CP120949	1,011,832 - 1,018,150	P4E65_36430; P4E65_36435; P4E65_36440	RND
CP120949	694,209 - 701,201	P4E65_35040; P4E65_35045; P4E65_35050; P4E65_35055	RND
CP120949	1,030,983 - 1,033,241	P4E65_36510; P4E65_36515	MFS
CP120949	1,033,255 - 1,038,092	P4E65_36520; P4E65_36525; P4E65_36530; P4E65_36535	MFS
CP120949	13,779 - 19,145	P4E65_32035; P4E65_32040; P4E65_32045; P4E65_32050; P4E65_32055	MFS
CP120949	477,337 - 482,010	P4E65_34065; P4E65_34070; P4E65_34075; P4E65_34080	ABC
CP120949	1,513,664 - 1,520,776	P4E65_38675; P4E65_38680; P4E65_38685; P4E65_38690	RND
